# Supplementary material
Source: PubMed Central journal article supplement (PMC2933921)
Supplement: NIHMS216035-supplement-Table_1S.pdf [file NIHMS216035-supplement-Table_1S.pdf]

**SUPPLEMENTARY TABLE I. Changes in cell morphology as a function of time in *U. maydis* *lis1*-depleted cells .**

| time<br>(h) | OD <sub>600</sub>  | # cells<br>examined | wild-type<br>morphology | # aberrantly-<br>shaped cells | % aberrantly-<br>shaped cells <sup>a</sup> |
|-------------|--------------------|---------------------|-------------------------|-------------------------------|--------------------------------------------|
| 24          | 0.154              | 164                 | 139                     | 25                            | 15.2                                       |
| 48          | 0.773              | 383                 | 137                     | 246                           | 64.2                                       |
| 72          | 1.072              | 573                 | 105                     | 468                           | 81.7                                       |
| 72          | 0.296 <sup>b</sup> | 217                 | 31                      | 186                           | 85.7                                       |
| 96          | 1.700              | 534                 | 55                      | 479                           | 89.7                                       |
| 96          | 0.544 <sup>b</sup> | 237                 | 20                      | 217                           | 91.6                                       |

<sup>a</sup> Aberrantly-shaped cells include peanut-shaped cells, cells with multiple buds and appendages, with multiple septa and beaded-appearance, with laterals buds, other irregular shape, and small wild-type-like cells that were vacuolated and shriveled.

<sup>b</sup> The culture was diluted 1:10 at the 48 h time point and incubated for an additional 24 and 48 h, respectively.
