# Supplementary material
Source: PubMed Central journal article supplement (PMC2933921)
Supplement: NIHMS216035-supplement-Table_2S.pdf [file NIHMS216035-supplement-Table_2S.pdf]

**SUPPLEMENTARY TABLE II. Nuclear position in *U. maydis* wild type cells as a function of time**

---

| time h | # cells<br>examined | # unbudded<br>cells (%) | # budded<br>cells (%) | altered cell<br>morphology | nuclear position (%)    |                                  |
|--------|---------------------|-------------------------|-----------------------|----------------------------|-------------------------|----------------------------------|
|        |                     |                         |                       |                            | unbudded<br>cell center | budded<br>other than cell center |
| 24     | 109                 | 60 (55.)                | 49 (45.)              | 0                          | 60 (100)                | 29 (59.2)                        |
| 48     | 382                 | 310 (81.2)              | 64 (16.8)             | 8                          | 310 (100)               | 17 (26.6)                        |
| 72     | 573                 | 538 (93.9)              | 34 (5.9)              | 1                          | 538 (100)               | 19 (55.8)                        |
| 96     | 153                 | 121 (79.1)              | 32 (20.9)             | 0                          | 121 (100)               | 18 (56.3)                        |

---
