# Supplementary material
Source: PubMed Central journal article supplement (PMC2933921)
Supplement: NIHMS216035-supplement-Table_3S.pdf [file NIHMS216035-supplement-Table_3S.pdf]

**SUPPLEMENTARY TABLE IIIS. Effect of thiabendazole on number of nuclei in *lisI*-depleted cells**

| strain                   | TBZ<br>$\mu\text{g/ml}$ | total #<br>cells | Number of nuclei |            |           |          |         |   |
|--------------------------|-------------------------|------------------|------------------|------------|-----------|----------|---------|---|
|                          |                         |                  | 1                | 2          | 3         | 4        | 5       | 6 |
|                          |                         |                  | # (%)            |            |           |          |         |   |
| FB1                      | 0                       | 286              | 281 (98.3)       | 5 (1.8)    | 0         | 0        | 0       | 0 |
| FB1                      | 2                       | 265              | 250 (94.3)       | 15 (5.7)   | 0         | 0        | 0       | 0 |
| FB1                      | 5                       | 738              | 689 (93.4)       | 49 (6.6)   | 0         | 0        | 0       | 0 |
| <i>lisI</i> <sup>a</sup> | 0                       | 164              | 34 (20.7)        | 81 (49.4)  | 33 (20.1) | 13 (7.9) | 3 (1.8) | 0 |
| <i>lisI</i> <sup>a</sup> | 2                       | 266              | 180 (67.7)       | 65 (24.4)  | 14 (5.3)  | 7 (2.6)  | 0       | 0 |
| <i>lisI</i> <sup>a</sup> | 5                       | 519              | 372 (71.7)       | 126 (24.3) | 13 (2.5)  | 8 (1.5)  | 0       | 0 |

<sup>a</sup> *lisI*-depleted cells
